# Supplementary material for: Thermomechanical Stresses in Silicon Chips for Optoelectronic Devices
Source: MDPI journal article supplement (doi:10.3390/app13042737), 2023-02-20
Supplement: s1 [file s1]

# SUPPORTING INFORMATION

## Thermomechanical stresses in silicon chips for optoelectronic devices

Claudia Mezzalana<sup>1</sup>, Fosca Conti<sup>1,\*</sup>, Danilo Pedron<sup>1,2</sup>, and Raffaella Signorini<sup>1,2,\*</sup>

<sup>1</sup> Department of Chemical Science, University of Padua, Via Marzolo 1, I-35131 Padova, Italy;

<sup>2</sup> Consorzio INSTM, Via G. Giusti 9, I-50121 Firenze, Italy;

\*Correspondence: RS raffaella.signorini@unipd.it; Tel.: +390498275118. FC Fosca.conti@unipd.it; Tel.: +390498275226

### Raman shift of the A\_AuSn Sample at increasing and decreasing temperatures

The Raman shift has been measured in the central position [6,6] of the sample, at -50, -40, -20, 0, 20, 50, 80, 110, 140, 180°C, using two different thermal processes: heating the sample, i.e. increasing the temperature (@ raising T in Table S1), and cooling the sample, i.e. decreasing the temperature (@ lowering T in Table S1).

**Table S1.** Comparison between results acquired at position [6,6] of the A\_AuSn sample at increasing (from -50 to 180°C) and at decreasing (from 180 to -50°C) temperature. FWHM: full width at half maximum.

| Temperature<br>[°C] | @ raising T                        |                             | @ lowering T                       |                             |
|---------------------|------------------------------------|-----------------------------|------------------------------------|-----------------------------|
|                     | Raman shift<br>[cm <sup>-1</sup> ] | FWHM<br>[cm <sup>-1</sup> ] | Raman shift<br>[cm <sup>-1</sup> ] | FWHM<br>[cm <sup>-1</sup> ] |
| -50                 | 523.06 ± 0.07                      | 8.20 ± 0.23                 | 523.06 ± 0.07                      | 8.20 ± 0.23                 |
| -40                 | 522.72 ± 0.07                      | 8.15 ± 0.22                 | 522.76 ± 0.07                      | 8.39 ± 0.24                 |
| -20                 | 522.09 ± 0.07                      | 8.41 ± 0.23                 | 522.08 ± 0.08                      | 8.79 ± 0.26                 |
| 0                   | 521.41 ± 0.07                      | 8.52 ± 0.24                 | 521.47 ± 0.07                      | 8.66 ± 0.24                 |
| 20                  | 520.74 ± 0.07                      | 8.48 ± 0.20                 | 520.64 ± 0.06                      | 8.48 ± 0.20                 |
| 50                  | 519.78 ± 0.06                      | 8.58 ± 0.21                 | 519.45 ± 0.05                      | 8.98 ± 0.22                 |
| 80                  | 518.80 ± 0.06                      | 8.71 ± 0.19                 | 518.45 ± 0.05                      | 9.00 ± 0.19                 |
| 110                 | 517.85 ± 0.05                      | 8.74 ± 0.17                 | 517.77 ± 0.04                      | 8.51 ± 0.15                 |
| 140                 | 516.87 ± 0.04                      | 8.67 ± 0.13                 | 516.87 ± 0.04                      | 8.57 ± 0.13                 |
| 180                 | 515.67 ± 0.04                      | 8.70 ± 0.12                 | 515.67 ± 0.04                      | 8.57 ± 0.13                 |
